# Supplementary material for: A simple, safe and robust system for hydrogenation “without high-pressure gases” under batch and flow conditions using a liquid organic hydrogen carrier
Source: Royal Society of Chemistry journal article supplement (doi:10.1039/d1gc03850h), 2022-01-01
Supplement: d1gc03850h1.pdf [file d1gc03850h1.pdf]

## Supporting information

A simple, safe and robust system for hydrogenation “without high-pressure gases” under batch and flow conditions using a liquid organic hydrogen carrier.

Raul Porcar,<sup>a,c</sup> Andrés Mollar-Cuni,<sup>b</sup> David Ventura-Espinosa,<sup>b</sup> Santiago V. Luis,<sup>a</sup> Eduardo García-Verdugo\*<sup>a</sup> and Jose A. Mata\*<sup>b</sup>

<sup>a</sup> Department of Inorganic and Organic Chemistry, Universitat Jaume I, Avda Sos Baynat s/n, E-12071, Castellón, Spain. [cepeda@uji.es](mailto:cepeda@uji.es)

<sup>b</sup> Institute of Advanced Materials (INAM), Universitat Jaume I, Avda. Sos Baynat s/n, 12006 Castellón, Spain. [jmata@uji.es](mailto:jmata@uji.es)

<sup>c</sup> Departamento de Química Orgánica y Bio-Orgánica, Facultad de Ciencias, UNED, Av. de Esparta s/n, Carretera de Las Rozas al Escorial km 5, E-28232, Las Rozas-Madrid, Spain.

### Table of Contents

- SI1. Video of the liquid-gas separator tested for the continuous production of hydrogen.
- SI2. Video of set-up optimized to continuous production of hydrogen.
- SI3. Set-up for the hydrogenation of different reagents under batch conditions.
- SI4. Set-up for the hydrogenation of different reagents under flow conditions.
- SI5. Video of the hydrogenation of different reagents under flow conditions.
- SI6. <sup>1</sup>H-NMR spectrum of **3a** in DMSO-*d*<sub>6</sub>.
- SI7. <sup>1</sup>H-NMR spectrum of **4a** in DMSO-*d*<sub>6</sub>.
- SI8. <sup>1</sup>H-NMR spectrum of **3b** in DMSO-*d*<sub>6</sub>.
- SI9. <sup>1</sup>H-NMR spectrum of **4b** in CD<sub>3</sub>OD.
- SI10. <sup>1</sup>H-NMR spectrum of **3c** in DMSO-*d*<sub>6</sub>.
- SI11. <sup>1</sup>H-NMR spectrum of **4c** in CD<sub>3</sub>OD.

**SI1. Video of the liquid-gas separator tested for the continuous production of hydrogen.**

Separate ESI file attached.

**SI2. Video of set-up optimized to continuous production of hydrogen.**

Separate ESI file attached.

**SI3. Set-up for the hydrogenation of different reagents under batch conditions.**

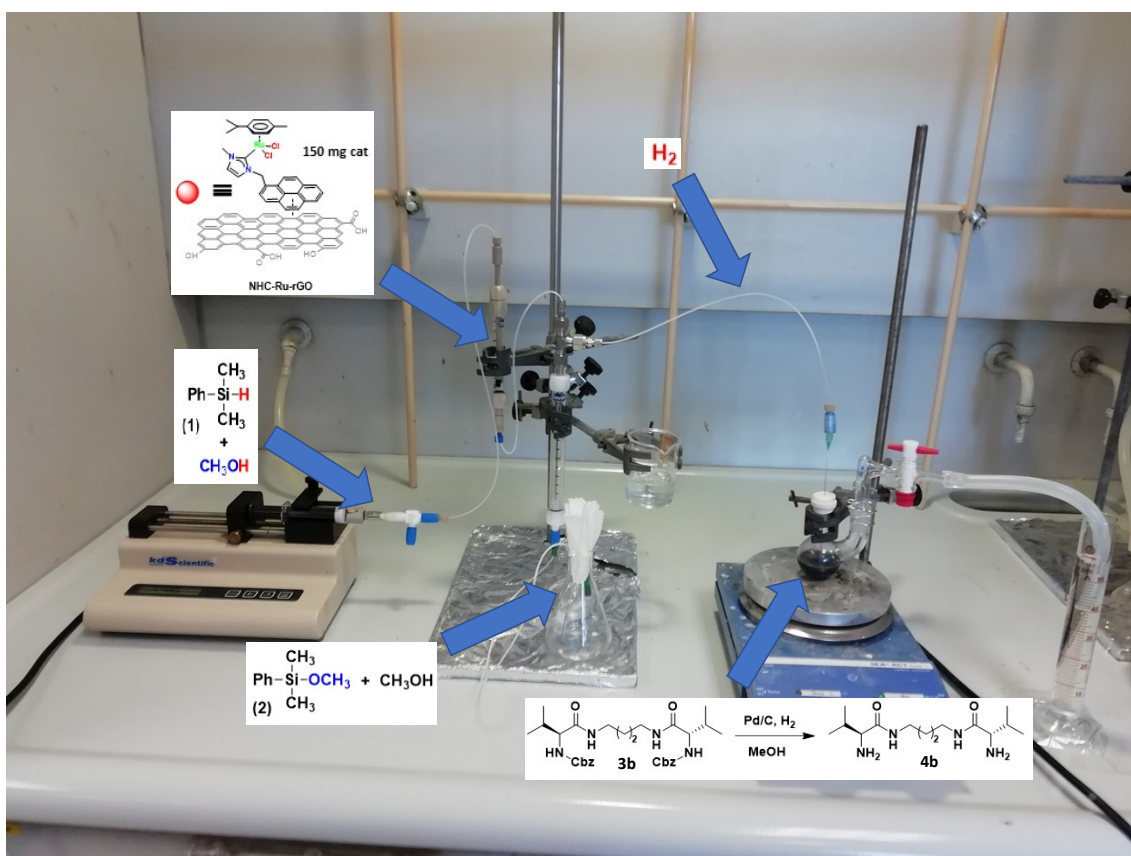

**SI4. Set-up for the hydrogenation of different reagents under flow conditions.**

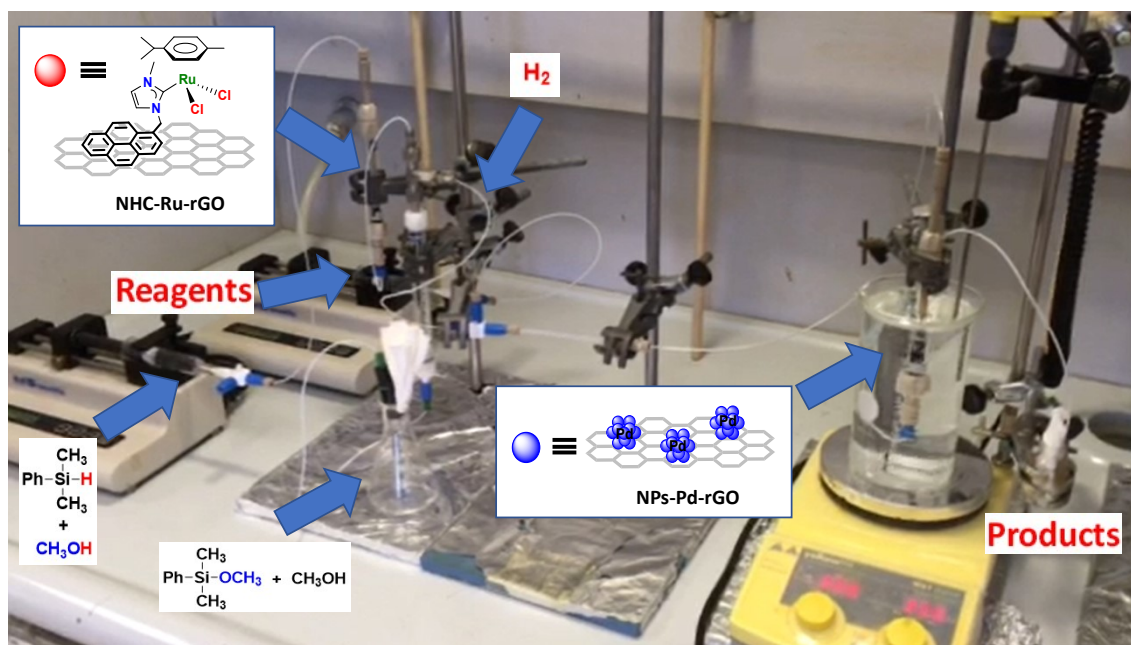

**SI5. Video of the hydrogenation of different reagents under flow conditions.**

Separate ESI file attached.

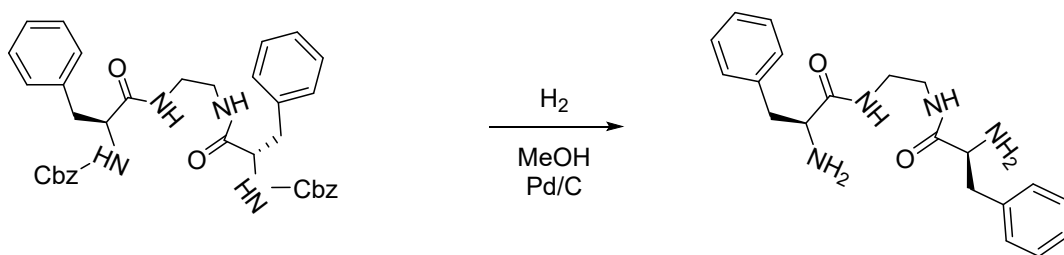

Experimental: 0.352g (0.565 mmol) of N-Cbz-PheA2 (**3a**) were added to 15mL of MeOH in a 50mL twin-neck round bottom flask. After two minutes of sonication, a white suspension was observed. The suspension was purged with three N<sub>2</sub> balloons and stirred at room temperature. 0.120g (10mol%) of Pd/C (5% metal basis) were added to the flask while another N<sub>2</sub> balloon was purging the system to maintain the inert atmosphere. The exit of the reactor was bubbled into the suspension through a syringe needle, serving as the hydrogen source. To avoid over-pressures, another syringe needle connected to a flow tube was introduced on the suspension and bubbled into a water solution, where some bubbles could be observed. After 4 hours of reaction, the black suspension was filtered off with the aid of Celite and the final clear methanolic solution was dried under reduced vacuum at 35 °C, affording pure **4a** as a white solid. Yield: 94% (0.188 g, 0.531 mmol).

Characterization:

mp= 118-119 °C;

$[\alpha]_{\text{D}}^{25} = -86.9^\circ$  ( $c = 0.1$ , CHCl<sub>3</sub>); IR(KBr): 3358, 3299, 1655, 1529 cm<sup>-1</sup>; <sup>1</sup>H-NMR (300 MHz, DMSO-*d*<sub>6</sub>) ( $\delta$ , ppm):  $\delta = 7.89$  (d,  $J = 5.8$  Hz, 1H), 7.35 – 7.13 (m, 5H), 3.16 – 2.99 (m, 2H), 2.91 (dd,  $J = 13.3, 5.1$  Hz, 1H), 2.60 (dd,  $J = 13.3, 8.2$  Hz, 1H); <sup>13</sup>C-NMR (125 MHz, CDCl<sub>3</sub>) ( $\delta$ , ppm):  $\delta = 39.1, 40.9, 56.2, 126.3, 128.2, 128.8, 137.4, 174.7$ ;

ESI-MS ( $m/z$ ) 355.1 (M + H<sup>+</sup>), 377.1 (M + Na<sup>+</sup>);

Anal. Calcd. For C<sub>20</sub>H<sub>26</sub>N<sub>4</sub>O<sub>2</sub>: C, 67.8; H, 7.4; N, 15.8. Found: C, 67.9; H, 7.8; N, 16.0.

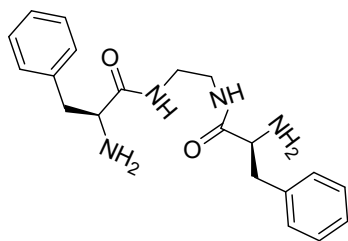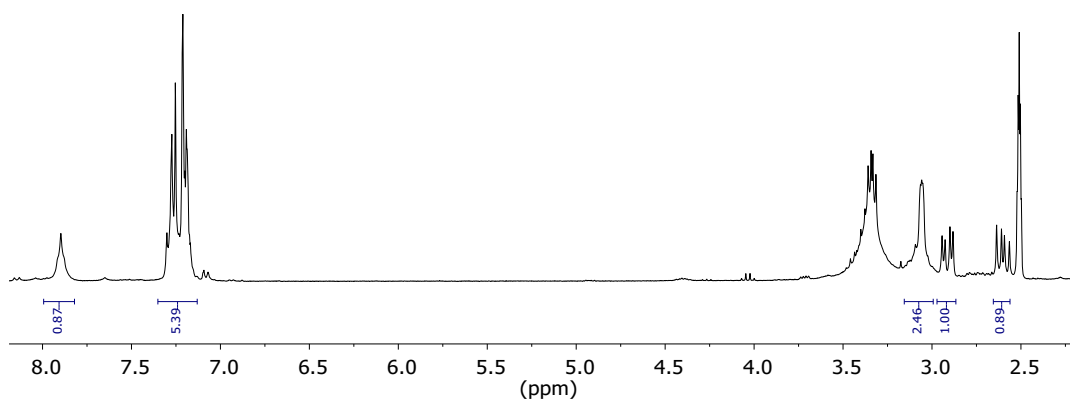

SI6.  $^1\text{H-NMR}$  spectrum of 3a in  $\text{DMSO-}d_6$ .

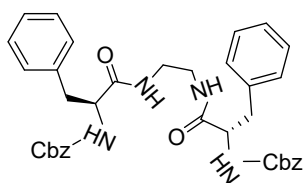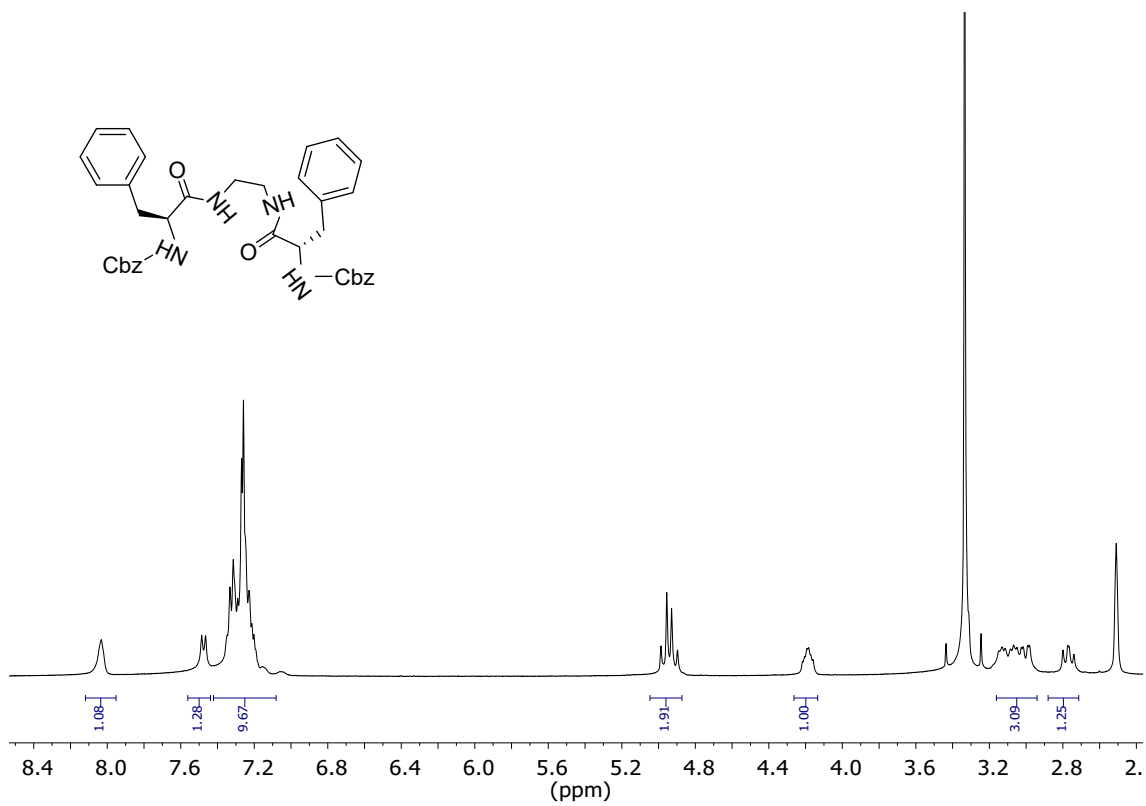

SI7.  $^1\text{H-NMR}$  spectrum of 3b in  $\text{DMSO-}d_6$ .

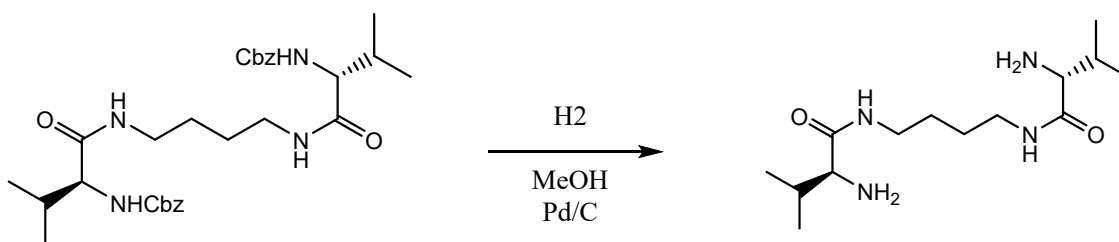

Experimental: 0.643g (1.159 mmol) of N-Cbz-ValA4 (**3b**) were added to 20mL of MeOH in a 50mL twin-neck round bottom flask. After two minutes of sonication, a white suspension was observed. The suspension was purged with three N<sub>2</sub> balloons and stirred at room temperature. 0.246g (10mol%) of Pd/C (5% metal basis) were added to the flask while another N<sub>2</sub> balloon was purging the system to maintain the inert atmosphere. The exit of the reactor was bubbled into the suspension through a syringe needle, serving as the hydrogen source. To avoid over-pressures, another syringe needle connected to a flow tube was introduced on the suspension and bubbled into a water solution, where some bubbles could be observed. After 4 hours of reaction, the black suspension was filtered off with the aid of Celite and the final clear methanolic solution was dried under reduced vacuum at 35 °C, affording pure **4b** as a white solid. Yield: 96% (0.318 g, 1.113 mmol).

Characterization:

mp 109-110 °C;

$[\alpha]_{D}^{25} = -48.4^{\circ}$  (c 0.1, CHCl<sub>3</sub>); IR (KBr) 3294, 1641, 1547 cm<sup>-1</sup> ;

<sup>1</sup>H-NMR (300 MHz, CDCl<sub>3</sub>) δ= 0.71 (d, 6H, J = 6.8 Hz), 0.85 (d, 6H, J= 7.1 Hz), 1.39-1.43 (m, 8H), 2.08 (m, 2H), 3.05 (d, 2H, J = 4.2 Hz), 3.14 (m, 4H), 7.27 (br s, 2H); <sup>13</sup>C-NMR (75 MHz, CDCl<sub>3</sub>) δ= 16.2, 19.5, 27.0, 30.9, 38.4, 60.2, 174.1;

ESI-MS m/z = 143.2 (M + 2H<sup>+</sup>);

Anal. Calcd. for C<sub>14</sub>H<sub>30</sub>N<sub>4</sub>O<sub>2</sub>: C, 58.7; H, 10.6; N, 19.6. Found: C, 58.9; H, 10.8; N 19.7.



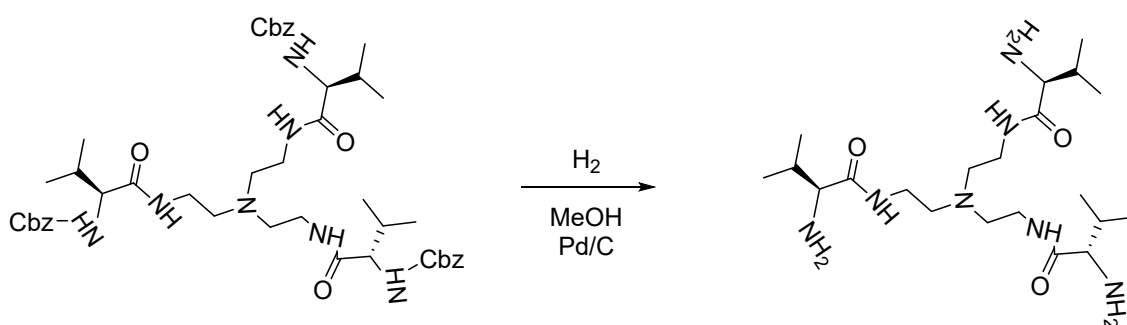

Experimental: 0.482g (0.570 mmol) of N-Cbz-Val-TREN (**3c**) were added to 15mL of MeOH in a 50mL twin-neck round bottom flask. After two minutes of sonication, a clear solution was observed. The solution was purged with three N<sub>2</sub> balloons and stirred at room temperature. 0.121g (10mol%) of Pd/C (5% metal basis) were added to the flask while another N<sub>2</sub> balloon was purging the system to maintain the inert atmosphere. The exit of the reactor was bubbled into the suspension through a syringe needle, serving as the hydrogen source. To avoid over-pressures, another syringe needle connected to a flow tube was introduced on the suspension and bubbled into a water solution, where some bubbles could be observed. After 3 hours of reaction, the black suspension was filtered off with the aid of Celite and the final clear methanolic solution was dried under reduced vacuum at 35 °C, affording pure **4c** as a colourless oil. Yield: 98% (0.248 g, 0.558 mmol).  
 Characterization:

mp= 118-123 °C;

$[\alpha]_D^{25} = -10.4^\circ$  (c = 0.01, CHCl<sub>3</sub>);

ATR-FTIR: 3290, 2956, 1629, 1555, 1464, 1229, 1103, 1088 cm<sup>-1</sup>; <sup>1</sup>H-NMR (300 MHz, CD<sub>3</sub>OD) (δ, ppm): δ= 3.21 – 3.16 (m, 2H), 3.01 (d, *J* = 5.6 Hz, 1H), 2.55 (t, *J* = 6.4 Hz, 2H), 1.87 (pd, *J* = 6.9, 5.6 Hz, 1H), 0.85 (dd, *J* = 15.4, 6.9 Hz, 6H); <sup>13</sup>C-NMR (125 MHz, CDCl<sub>3</sub>) (δ, ppm): δ= 16.4, 19.7, 31.1, 37.3, 54.4, 60.4, 174.6;

ATR-FTIR: 3282, 2958, 1639, 1534 cm<sup>-1</sup>;

HRMS (ESI-TOF)+ Calc for C<sub>21</sub>H<sub>45</sub>N<sub>7</sub>O<sub>3</sub> [**9**+H]<sup>+</sup> 444.3662 m/z, found 444.3662 m/z;

Anal. calcd. for C<sub>21</sub>H<sub>45</sub>N<sub>7</sub>O<sub>3</sub>: C, 56.86, H, 10.22, N, 22.10, found: C, 56.6, H, 10.0, N, 22.0.



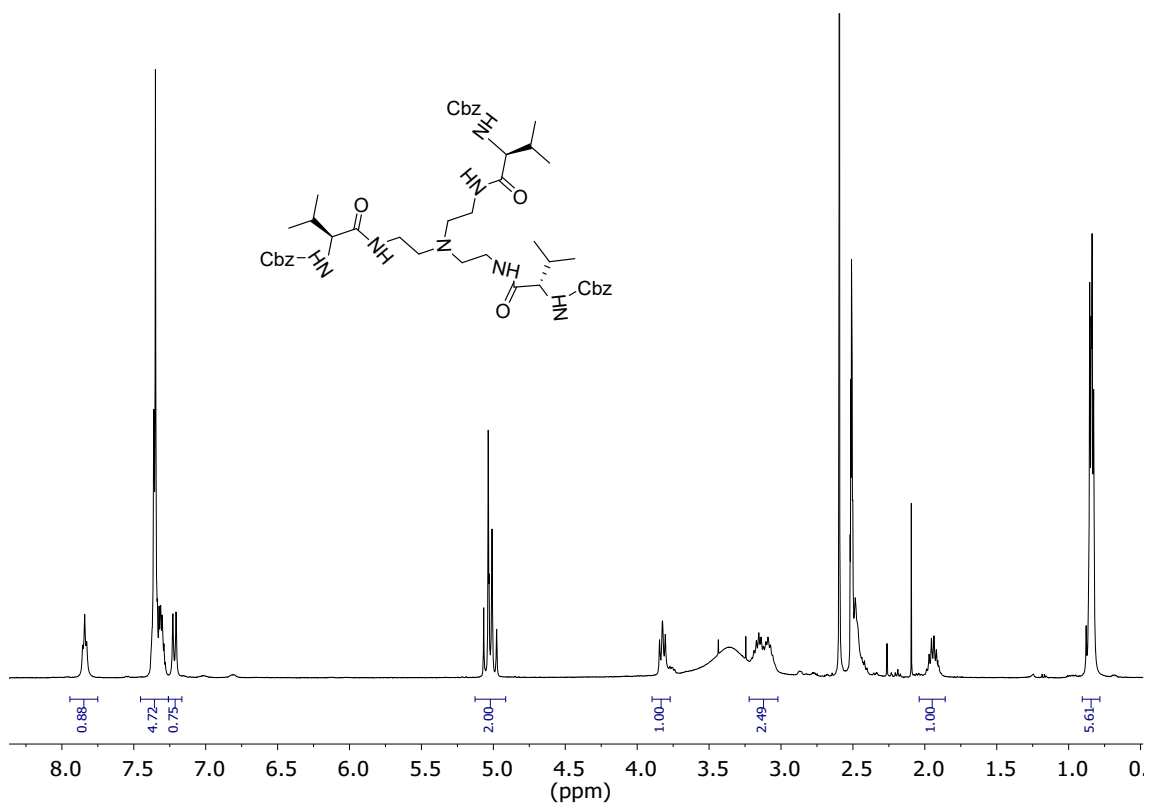

SI10. <sup>1</sup>H-NMR spectrum of 3c in DMSO-*d*<sub>6</sub>.

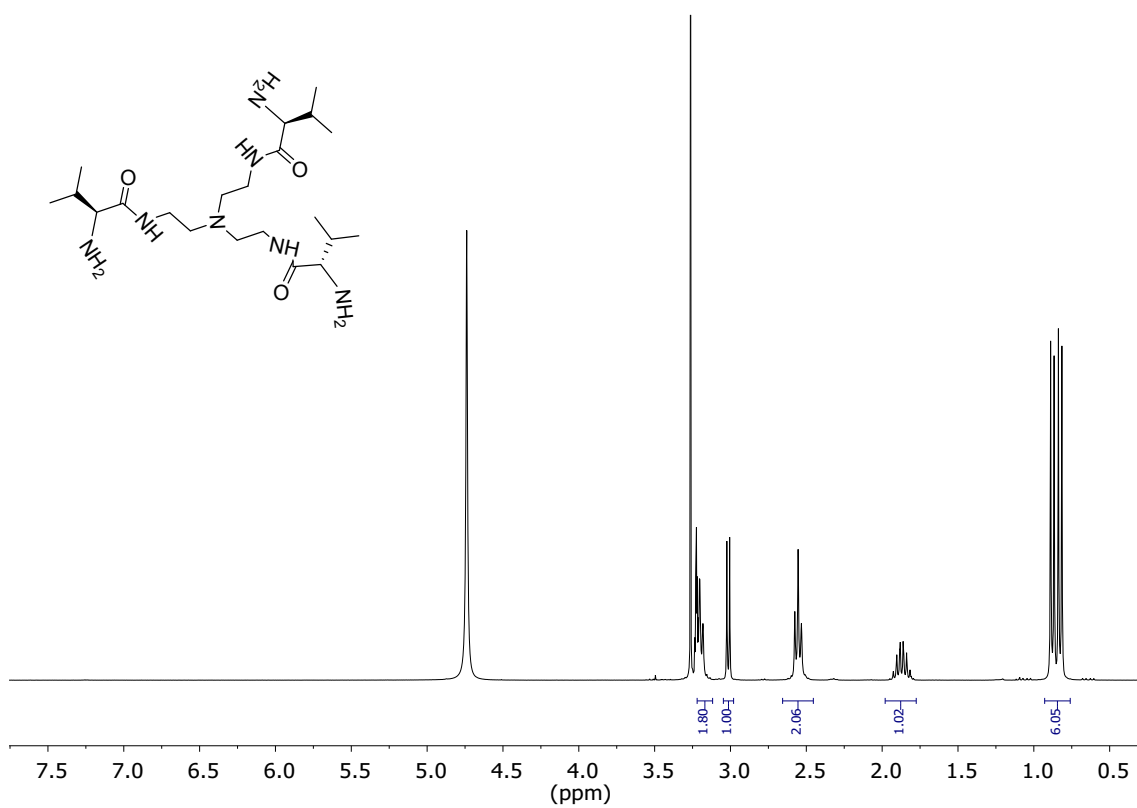

SI11. <sup>1</sup>H-NMR spectrum of 4c in CD<sub>3</sub>OD.
